# Supplementary material
Source: publisher figshare collection journal article supplement (https://karger.figshare.com/ndownloader/files/14606009)
Supplement: Supplementary file 1 [file 14606009]

**Supplementary Table 5.**  Characteristics of neuron profiles in the rostral perireticular nucleus.

| PARAMETER | ANTIBODY | |
| --- | --- | --- |
| Area (µm2) | PV | GAD |
| Number | 25 | 25 |
| Mean | 88.37 | 90.60 |
| Standard deviation | 22.46 | 22.75 |
| Range | 48.48-136.26 | 48.62-144.49 |
| Perimeter (µm) |  |  |
| Number | 25 | 25 |
| Mean | 39.22 | 39.96 |
| Standard deviation | 5.27 | 4.84 |
| Range | 27.75-48.91 | 31.64-53.33 |
| Length (µm) |  |  |
| Number | 25 | 25 |
| Mean | 13.78 | 13.25 |
| Standard deviation | 2.21 | 1.87 |
| Range | 9.20-18.32 | 11.03-18.11 |
| Width (µm) |  |  |
| Number | 25 | 25 |
| Mean | 8.21 | 8.71 |
| Standard deviation | 1.32 | 1.62 |
| Range | 5.81-10.84 | 5.65-11.64 |
| Eccentricity (Width/Length) |  |  |
| Number | 25 | 25 |
| Mean | 0.61 | 0.67 |
| Standard deviation | 0.13 | 0.14 |
| Range | 0.45-0.93 | 0.43-0.97 |
